# Supplementary material for: Carotid arterial wall inflammation in peripheral artery disease is augmented by type 2 diabetes: a cross-sectional study
Source: PubMed Central journal article supplement (PMC5124245; doi:10.1186/s12872-016-0397-x), 2016-11-25

## **Supplemental Material**

### **Supplemental Methods**

#### **Power calculations**

Our primary outcome will be the degree of arterial wall inflammation in patients with PAD, which we will compare to historical cohorts of healthy controls. Other studies have indicated that the mean maximal TBR in healthy controls is 1.6, whereas mean maximal TBR in CVD patients is 2.0. Moreover, in concordance with Rudd et al, we normally have a common standard deviation of 0.20 for vascular <sup>18</sup>F-FDG PET/CT imaging (Rudd, JACC 2007). Thus, when assuming a two group t-test with a 0,050 two-sided significance level and a power of 80%, we need to include 17 patients to observe a difference of at least 0.2 in TBR between groups.

**Supplemental table S1:** Overview of powercalculation

---

|                                                     |           |
|-----------------------------------------------------|-----------|
| <b>Test significance level, <math>\alpha</math></b> | 0.05      |
| <b>1 or 2 sided test?</b>                           | 2         |
| <b>Difference in means, <math>m_1 - m_2</math></b>  | 0.20      |
| <b>Common standard deviation, <math>s</math></b>    | 0.20      |
| <b>Power ( % )</b>                                  | 80        |
| <b>n per group</b>                                  | <b>17</b> |

---

**Supplemental table S2: Fontaine classification of PAD**

|                 | <b>2a</b> | <b>2b</b> | <b>3</b> | <b>Total</b> |
|-----------------|-----------|-----------|----------|--------------|
| <b>PAD only</b> | 7         | 3         | 1        | 11           |
| <b>PAD-DM</b>   | 13        | 6         | 4        | 23           |
| <b>NIDDM</b>    | 6         | 3         | 2        | 11           |
| <b>IDDM</b>     | 7         | 3         | 2        | 12           |

Data are n. PAD indicates Peripheral Artery Disease; *DM* Diabetes Mellitus; *NIDDM* Non-insulin dependent diabetes mellitus; *IDDM* insulin-dependent diabetes.

**Supplemental table S3: Medication use in PAD subjects**

| Type of medication | PAD only<br>n= 11 | PAD-DM<br>n= 23 | P-value | PAD-<br>NIDDM<br>n= 11 | PAD-<br>IDDM<br>n=12 | P-value |
|--------------------|-------------------|-----------------|---------|------------------------|----------------------|---------|
| Statin             | 10                | 19              | 0.532   | 8                      | 11                   | 0.231   |
| Antihypertensive   | 6                 | 22              | 0.003   | 11                     | 11                   | 0.382   |
| ACI/ARB            | 4                 | 14              | 0.180   | 7                      | 7                    | 0.795   |
| Calcium antagonist | 2                 | 11              | 0.096   | 4                      | 7                    | 0.292   |
| Diuretic           | 4                 | 13              | 0.271   | 7                      | 6                    | 0.510   |
| Beta blocker       | 4                 | 9               | 0.877   | 4                      | 5                    | 0.795   |

---

Data are n. PAD indicates Peripheral Artery Disease; *DM* Diabetes Mellitus; *NIDDM* Non-insulin dependent diabetes mellitus; *IDDM* insulin-dependent diabetes; *ACI* angiotensin-converting-enzyme inhibitor; *ARB* angiotensin II receptor antagonist

**Supplemental Table S4: Linear regression analysis for insulin in diabetic subjects**

| <b>Variable</b>    | <b>R square</b> | <b>P value</b> |
|--------------------|-----------------|----------------|
| C-peptide          | -0.037          | 0.538          |
| Daily insulin dose | 0.007           | 0.345          |

Insulin is the response variable. Explanatory factors comprised C-peptide and daily insulin dose.

Data are R square

**Supplemental Figure legend**

**Supplemental Figure 1:** Target to Background ratio ( $TBR_{mean}$ ) did not correlate to plasma C-peptide levels (Correlation coefficient:  $-0.019$ ,  $p=0.936$ ).

**Supplemental Figure 1**

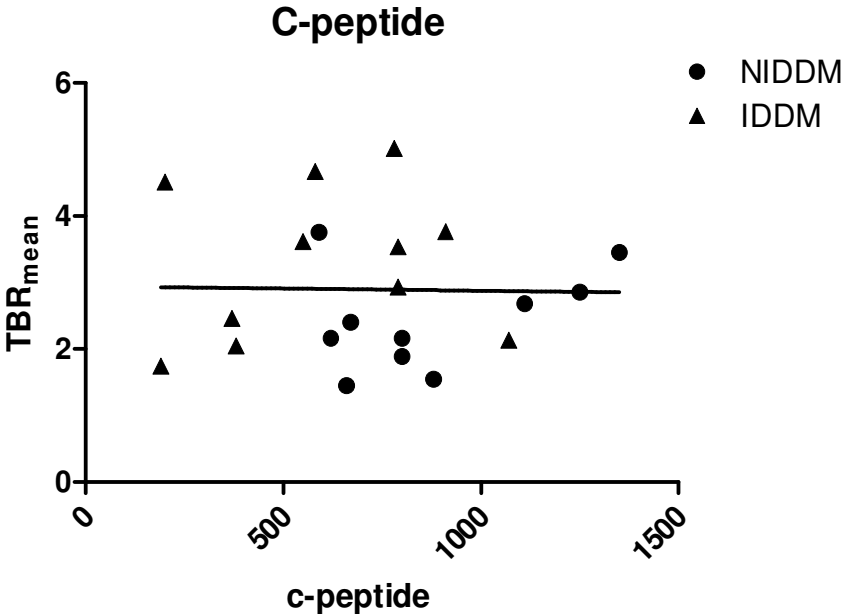

Supplement: 12872_2016_397_MOESM1_ESM.pdf [file 12872_2016_397_MOESM1_ESM.pdf]
